# Supplementary material for: Beclin 1 prevents ISG15-mediated cytokine storms to secure fetal hematopoiesis and survival
Source: JCI journal article supplement (doi:10.1172/jci177375), 2024-11-26
Supplement: sd2 [file 2]

# Unedited gel for Figure 1B, left panel

Note book3, P35

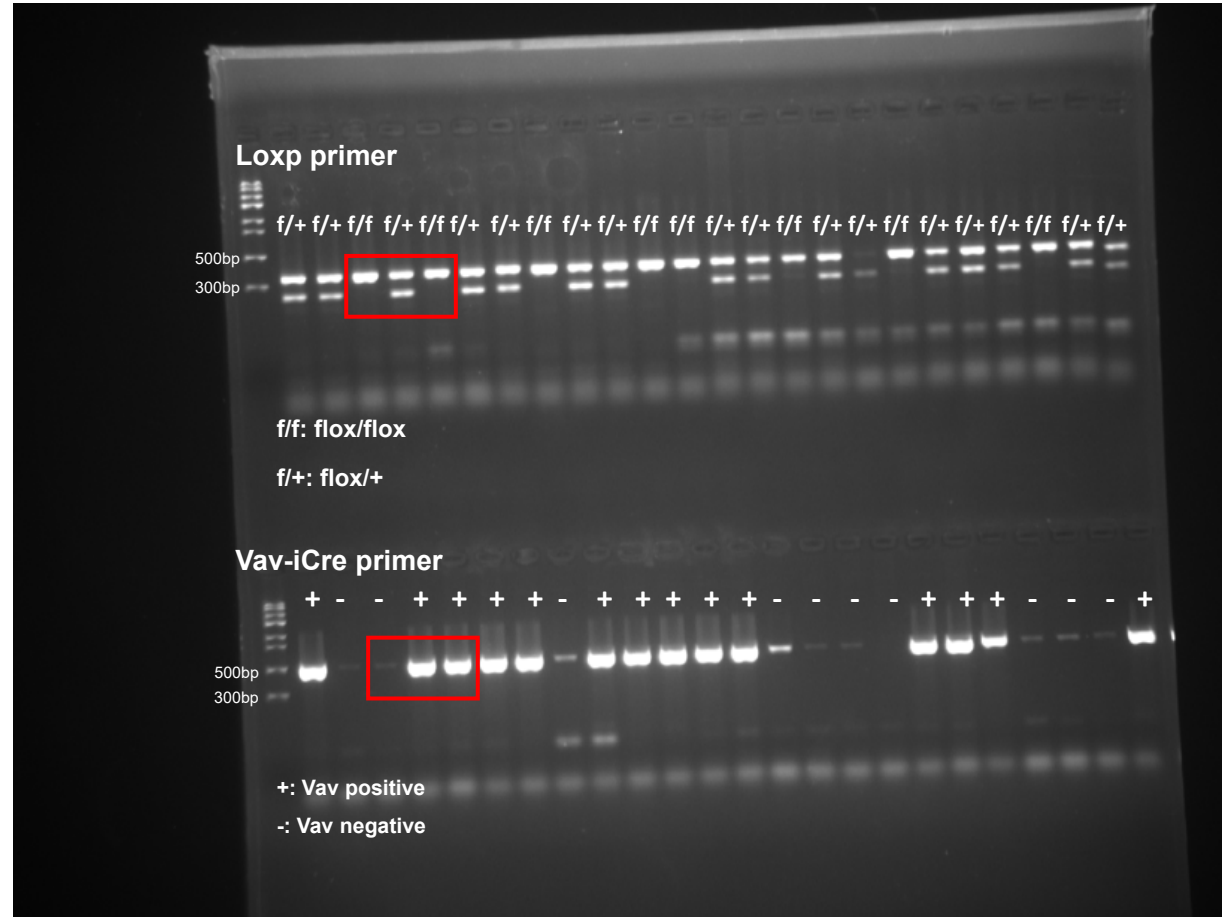

Jul 8, 2020

# Unedited blots for Figure 1B, right panel

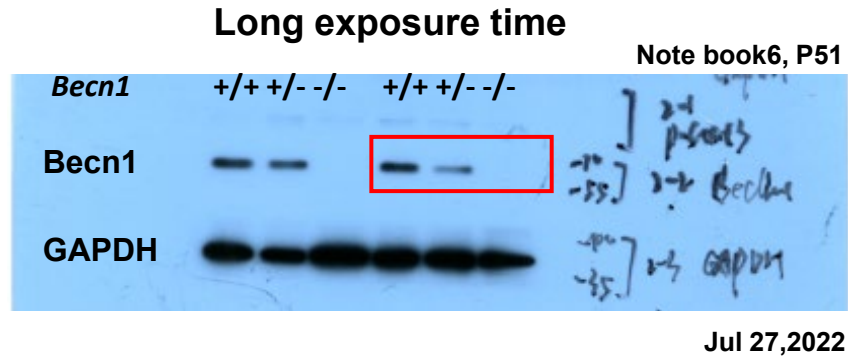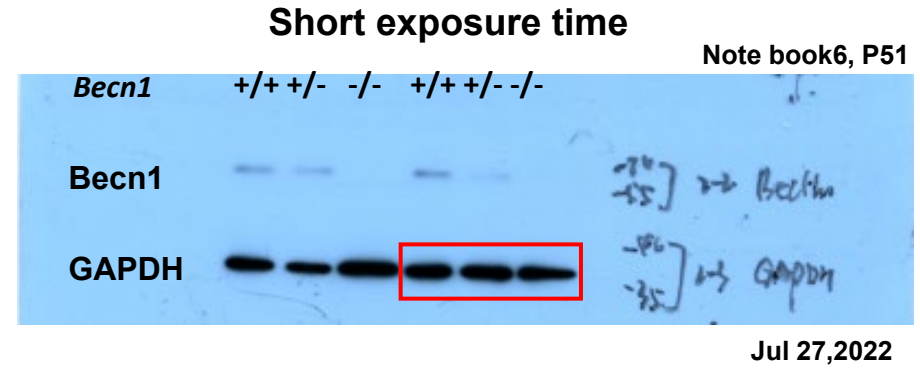

Unedited blots for Figure 5B

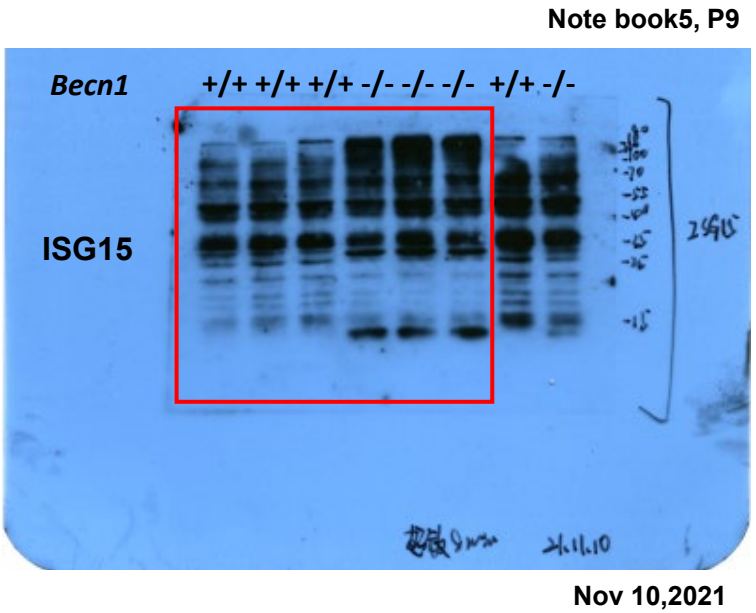

→

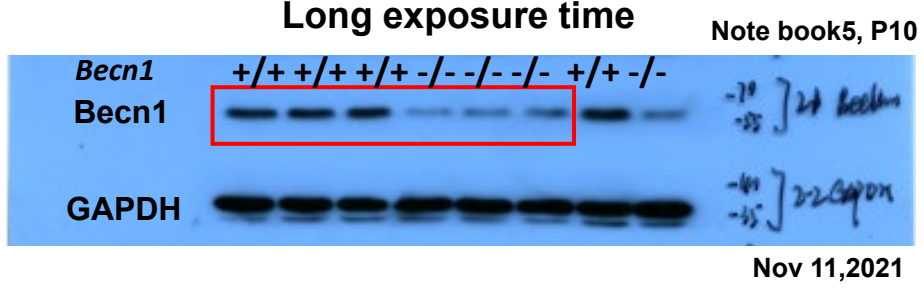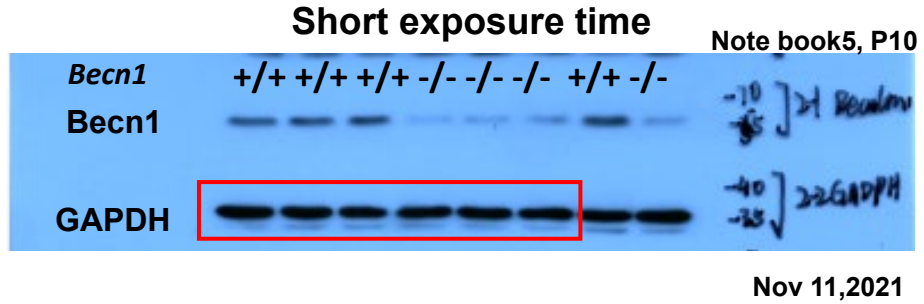

The right blots were reprobed from the left blot

# Unedited blots for Figure 6B

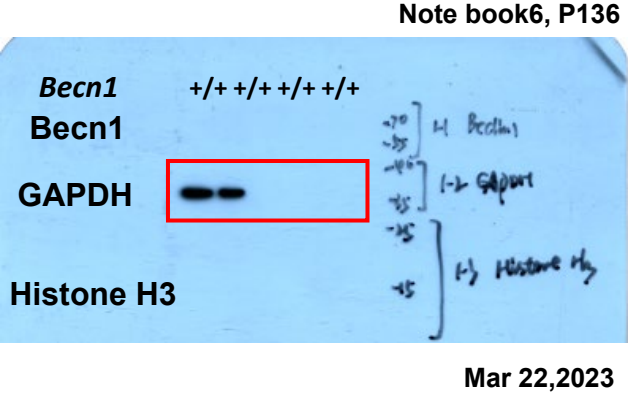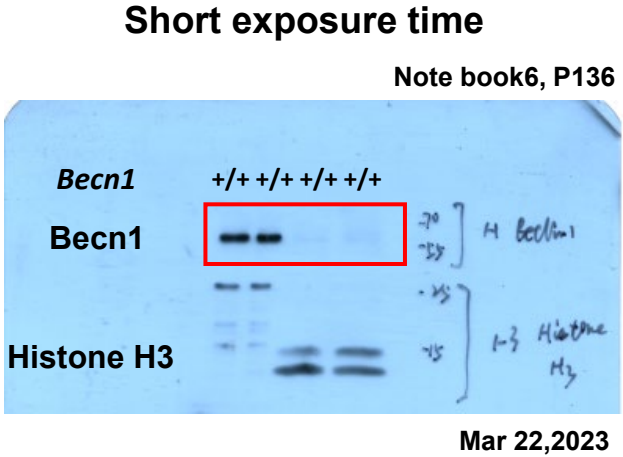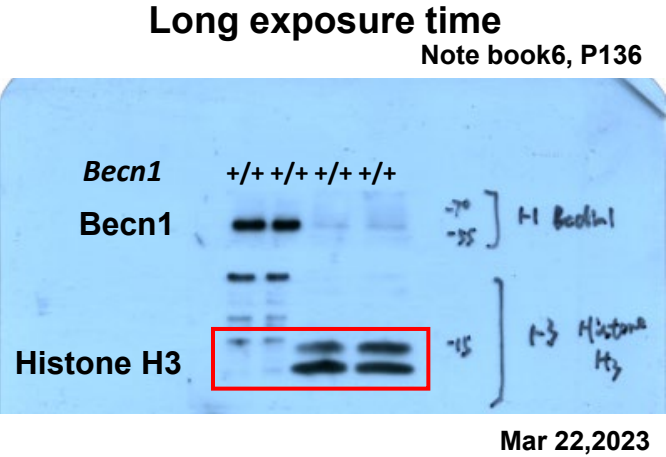

The middle and right films were from the same blot with different exposure time

# Unedited blots for Figure 6D (Left panel)

Shorter exposure time

Note book4, P143

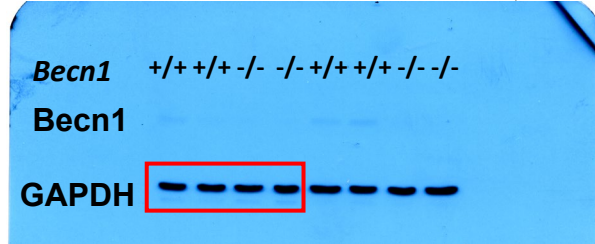

Oct 30, 2021

Short exposure time

Note book4, P143

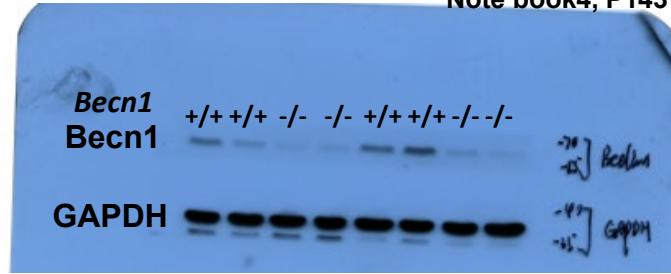

Oct 30, 2021

Long exposure time

Note book4, P143

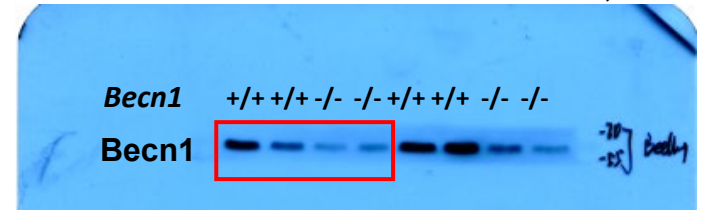

Oct 30, 2021

Shorter exposure time

Note book5, P45

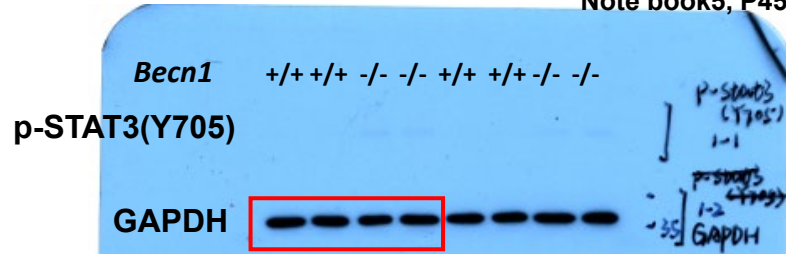

Dec 26, 2021

Short exposure time

Note book5, P45

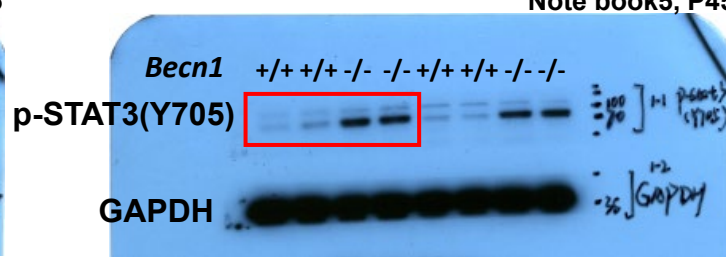

Dec 26, 2021

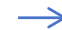

Note book5, P46

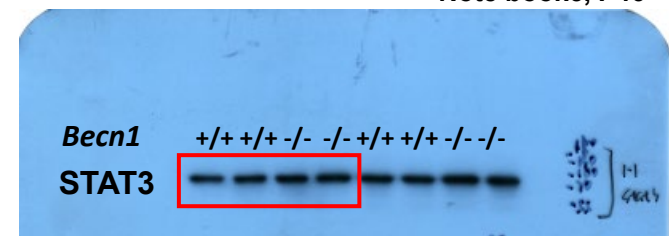

Dec 27, 2021

The blot of STAT3 was reprobbed from the blot of p-STAT3(Y705)

# Unedited blots for Figure 6D (Right panel)

Shorter exposure time

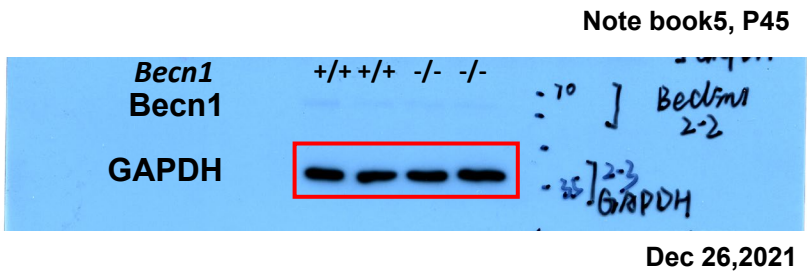

Short exposure time

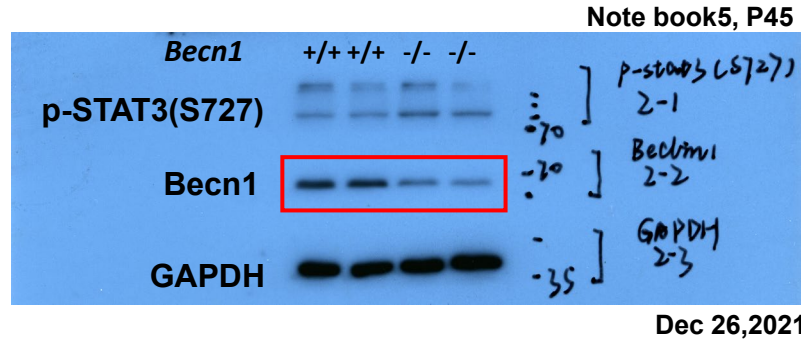

Long exposure time

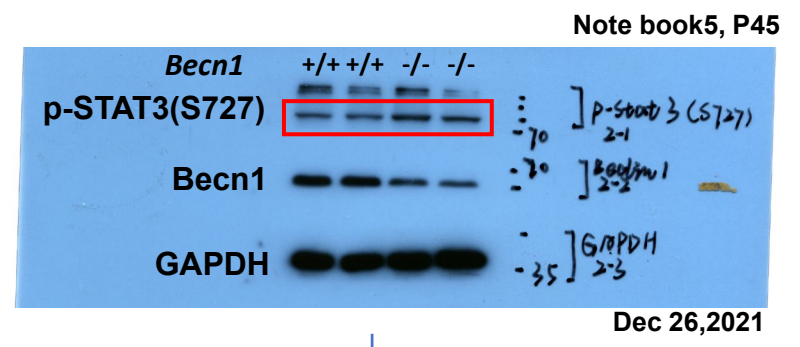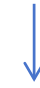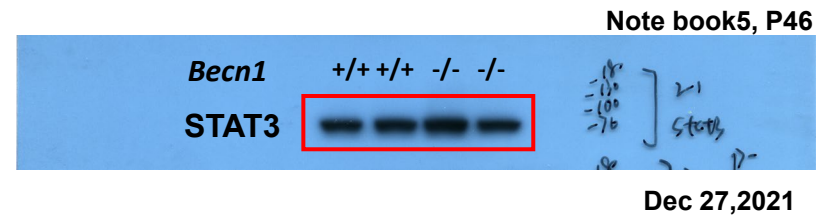

The blot of STAT3 was reprobred from the blot of p-STAT3(S727)

# Unedited blots for Figure 6F

Short exposure time

Long exposure time

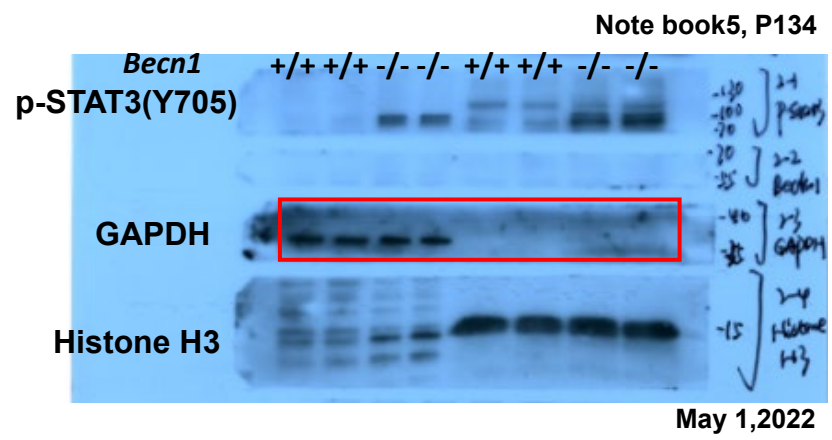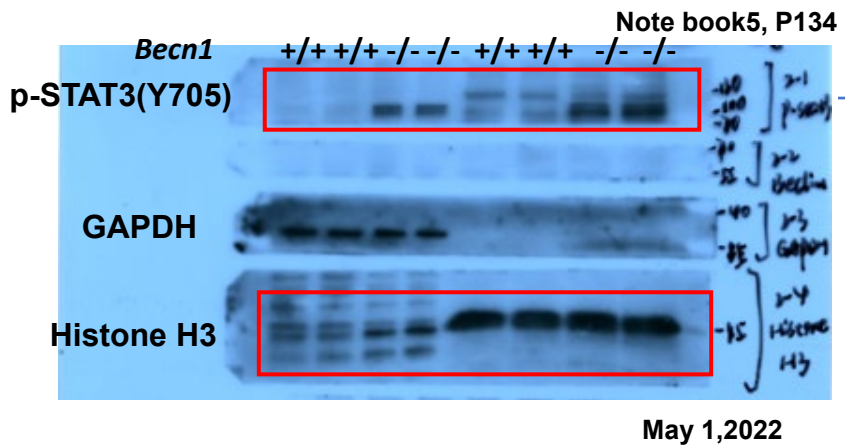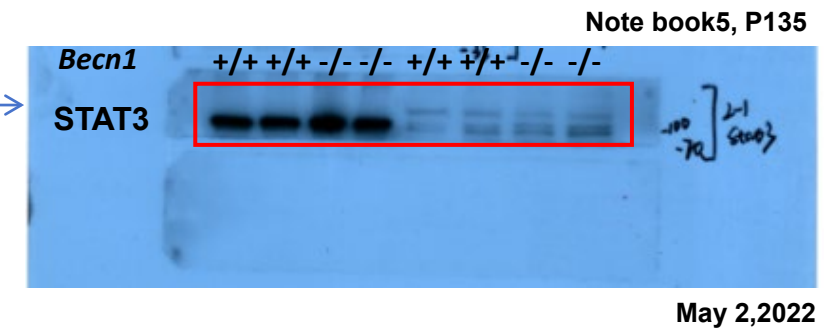

The blot of STAT3 was reprobed from the blot of p-STAT3(Y705)

# Unedited blots for Figure 8B

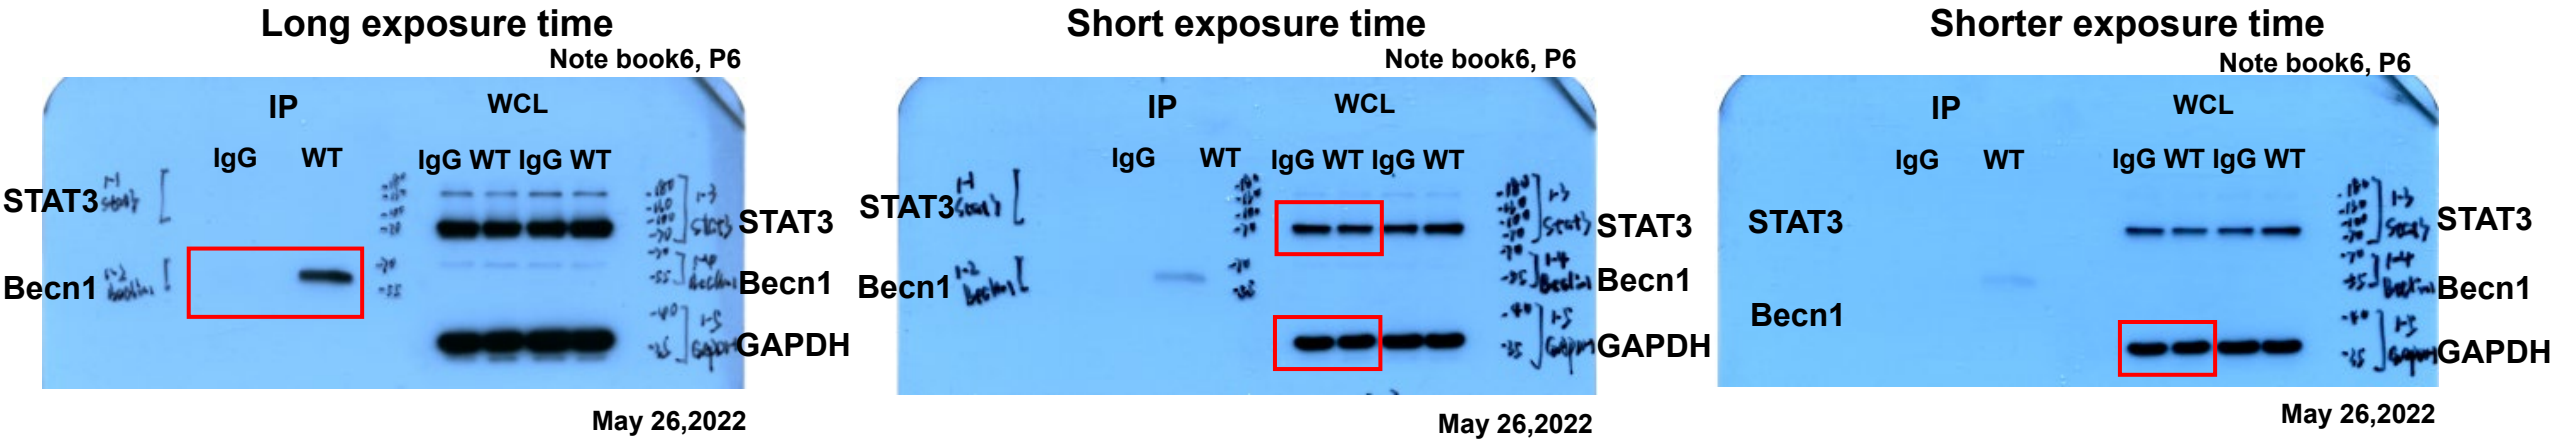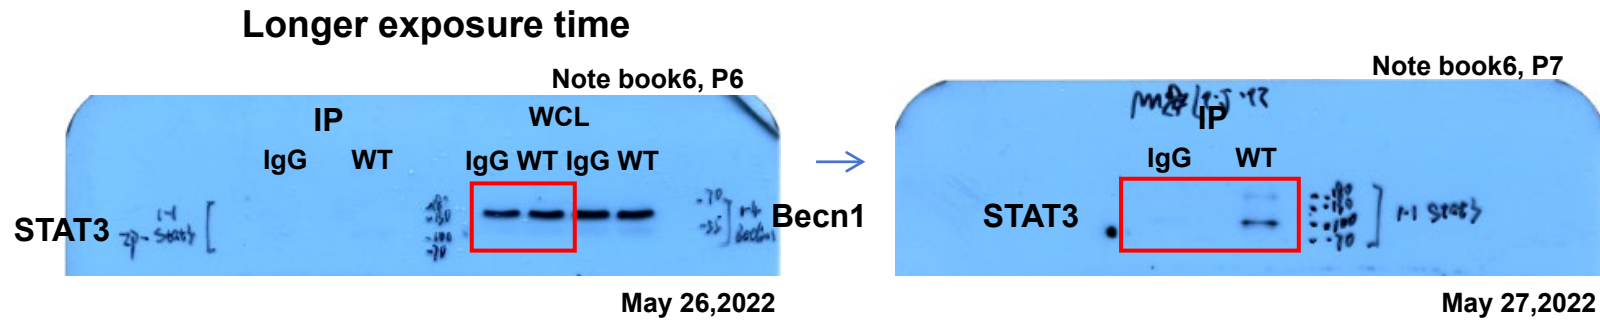

The right IP-STAT3 blot was reprobbed from the left IP-STAT3 blot

# Unedited blots for Figure 8D

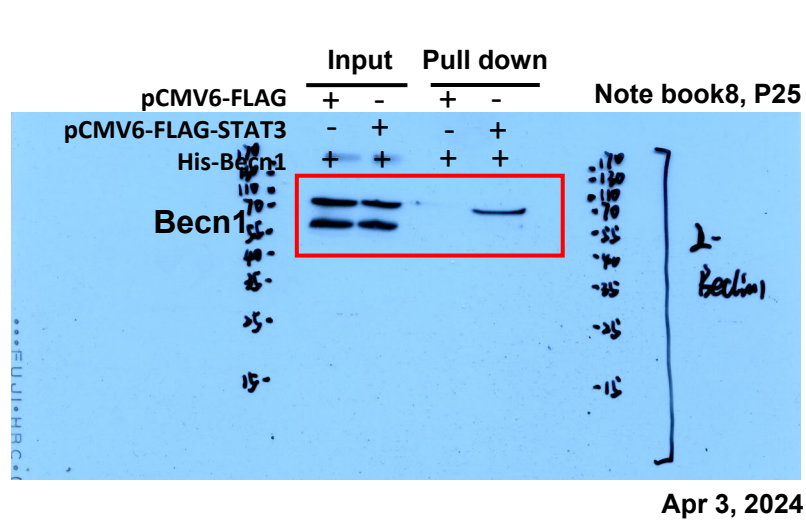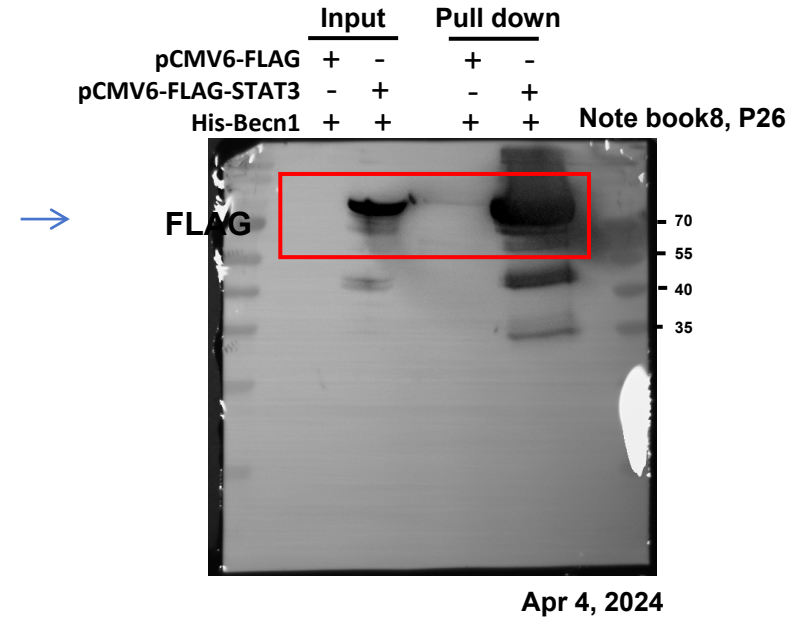

The right FLAG blot was reprobed from the left Becn1 blot

# Unedited blots for Figure 8I

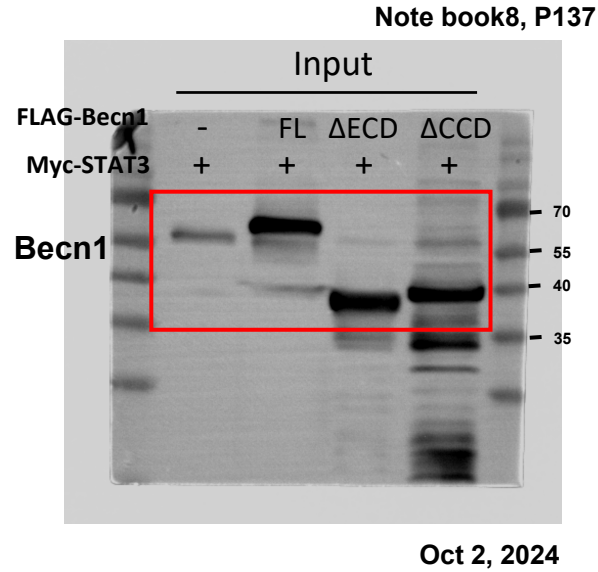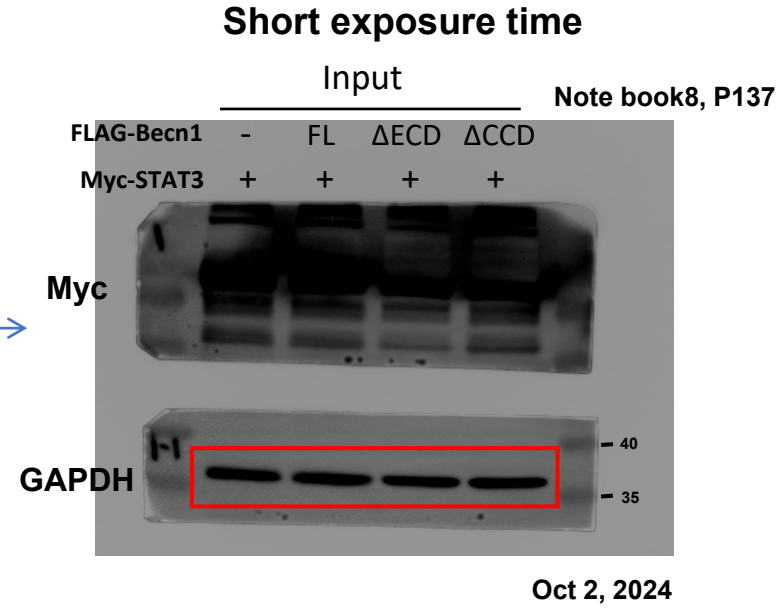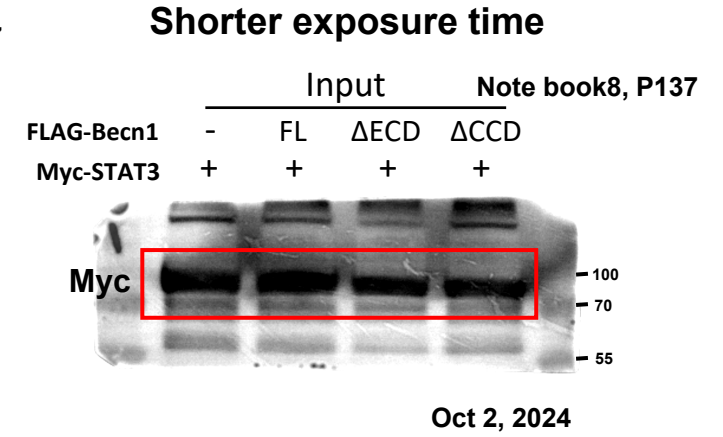

The right GAPDH and Myc blots were reprobbed from the left Becn1 blot

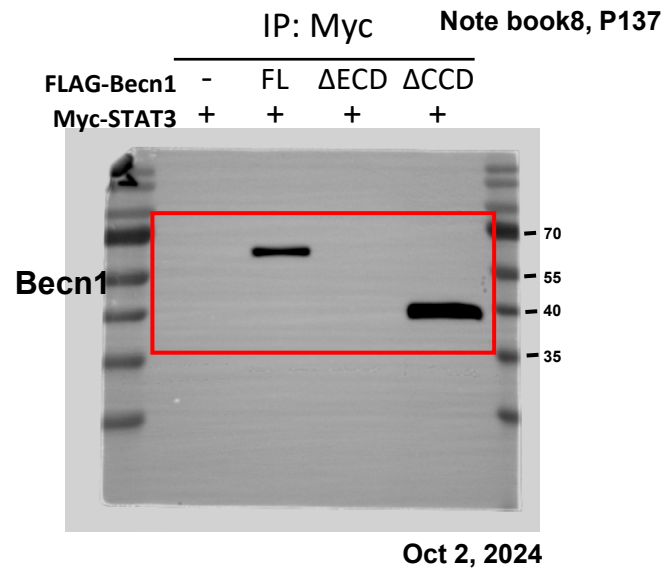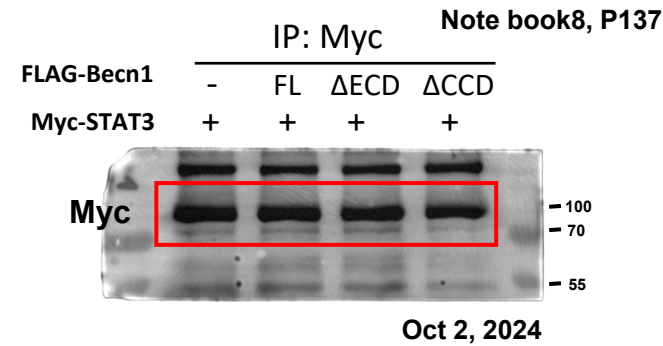

The right Myc blot was reprobbed from the left Becn1 blot

# Unedited blots for Figure 8J

Short exposure time

Note book8, P145

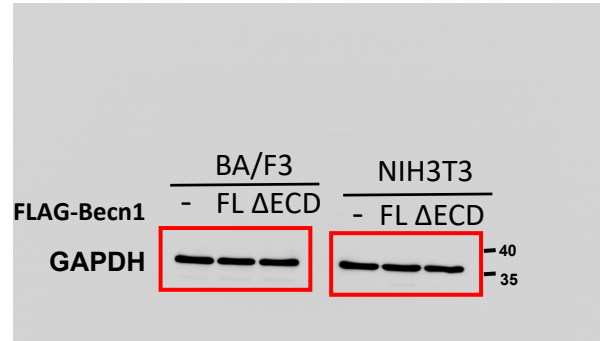

Nov 5, 2024

Long exposure time

Note book8, P145

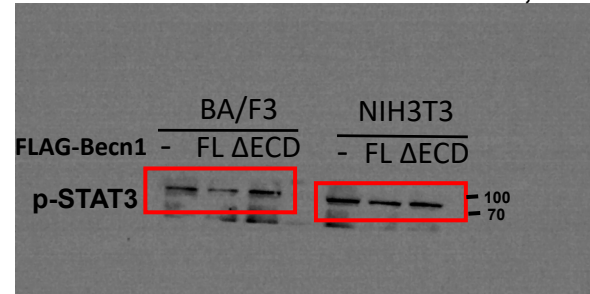

Nov 5, 2024

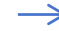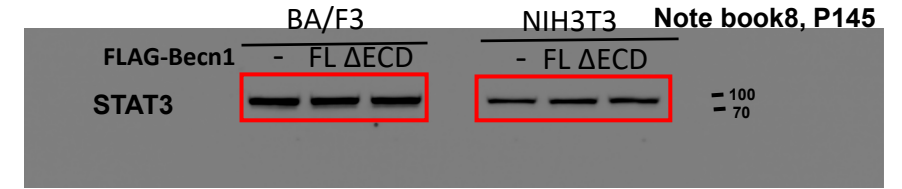

Nov 5, 2024

The STAT3 blots were reprobed from the p-STAT3 blot

Note book8, P145

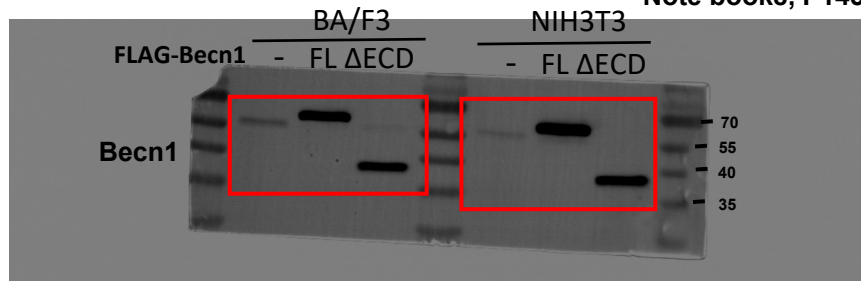

Nov 5, 2024

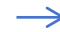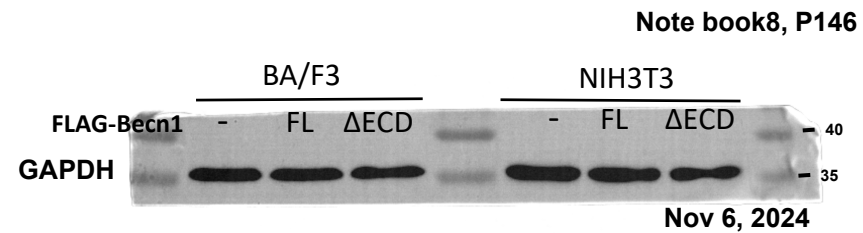

Nov 6, 2024

The GAPDH blots were reprobed from the Becn1 blot

# Unedited blots for Figure 9A

## Long exposure time

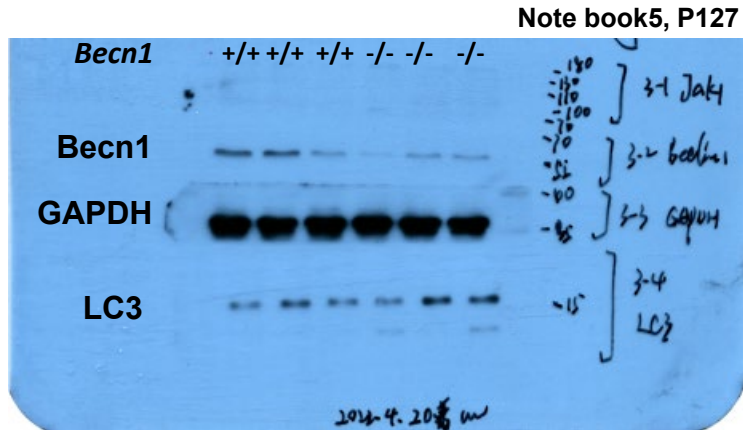

Apr 20,2022

## Short exposure time

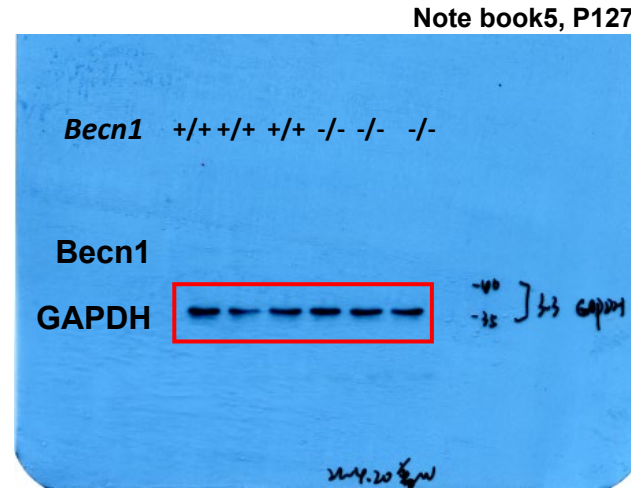

Apr 20,2022

## Longer exposure time

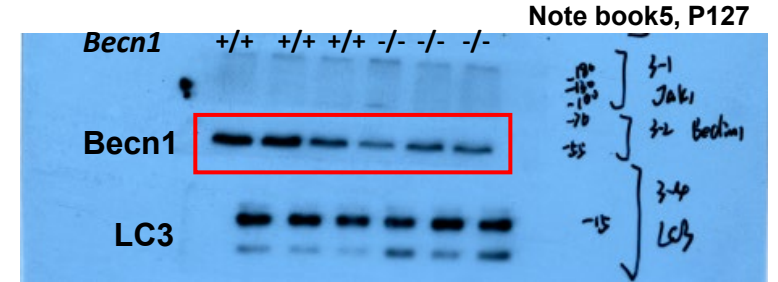

## Longer exposure time

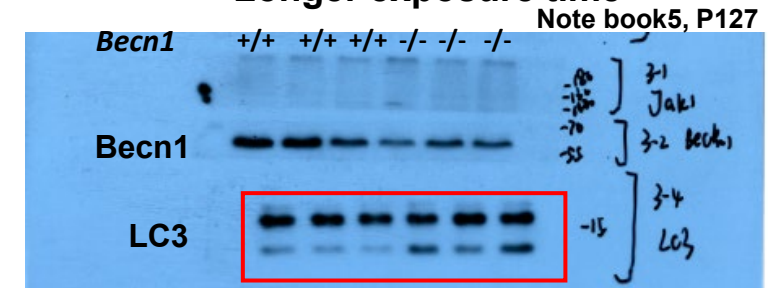

Apr 20,2022

## Long exposure time

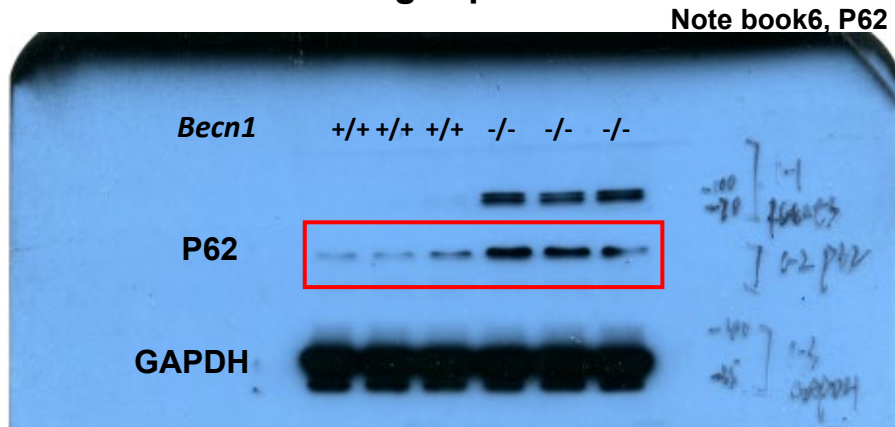

Aug 11,2022

## Short exposure time

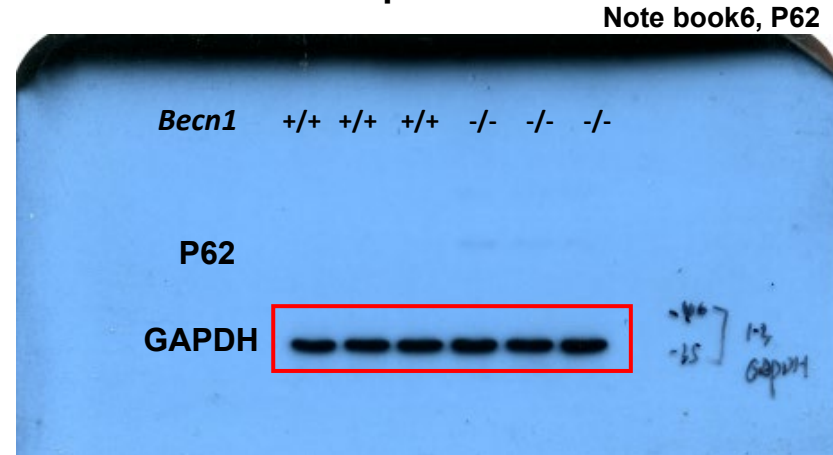

Aug 11,2022

# Unedited blots for Figure 9B

## Short exposure time

Note book8, P43

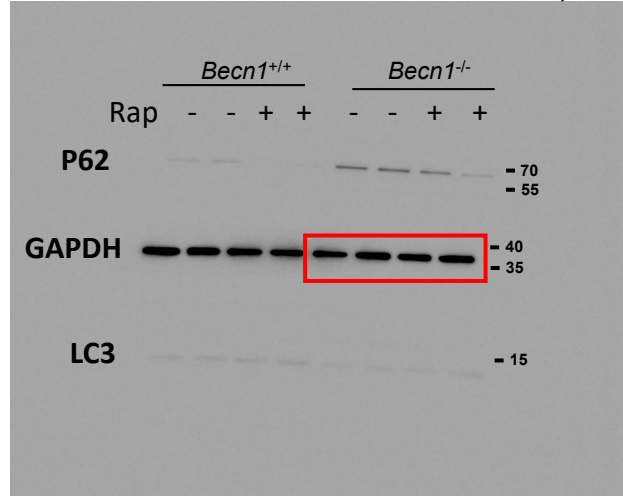

Apr 25,2024

## Long exposure time

Note book8, P43

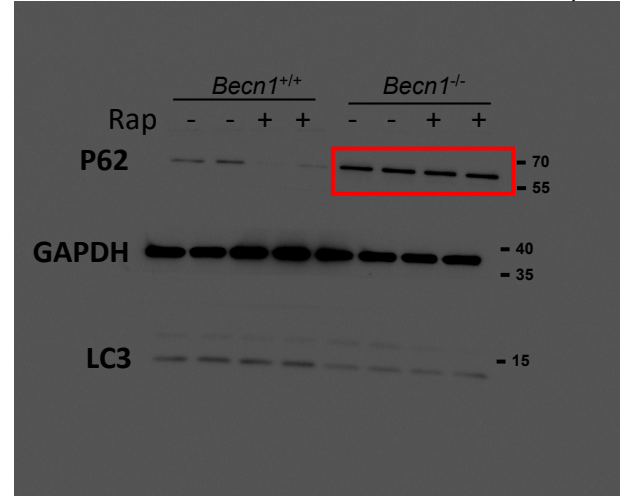

Apr 25,2024

## Longer exposure time

Note book8, P43

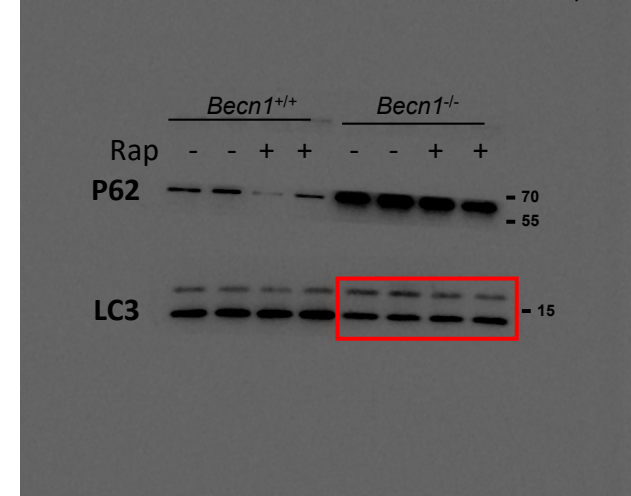

Apr 25,2024

# Unedited blots for Figure 9E

## Long exposure time

Note book6, P65

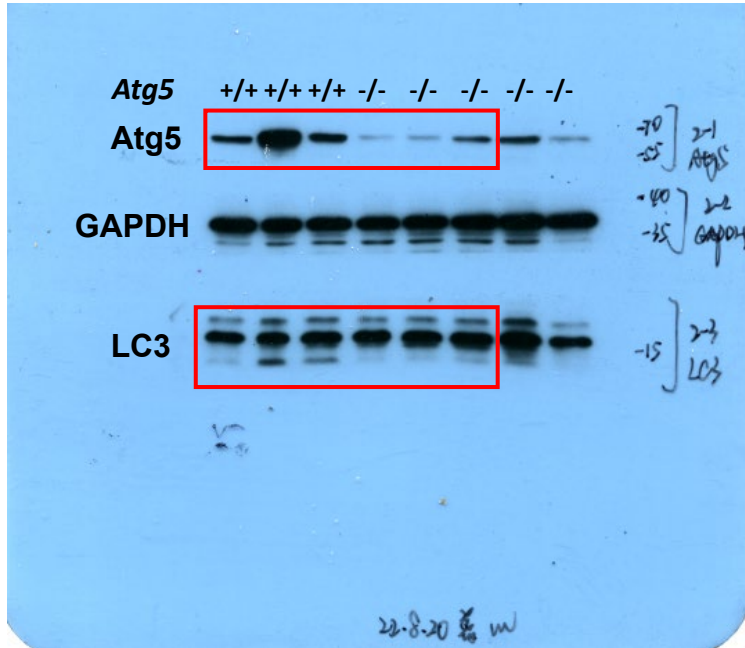

Aug 20,2022

## Short exposure time

Note book6, P65

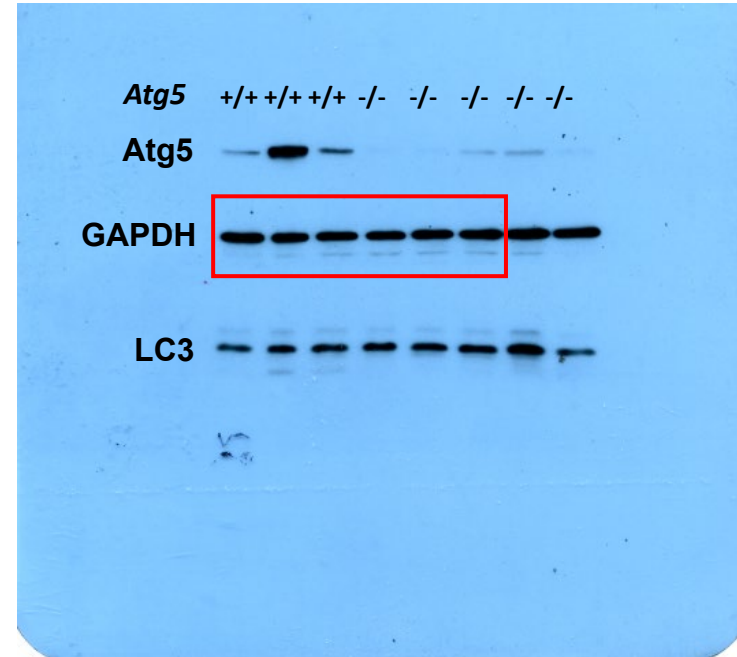

Aug 20,2022

# Unedited blots for Figure 9F

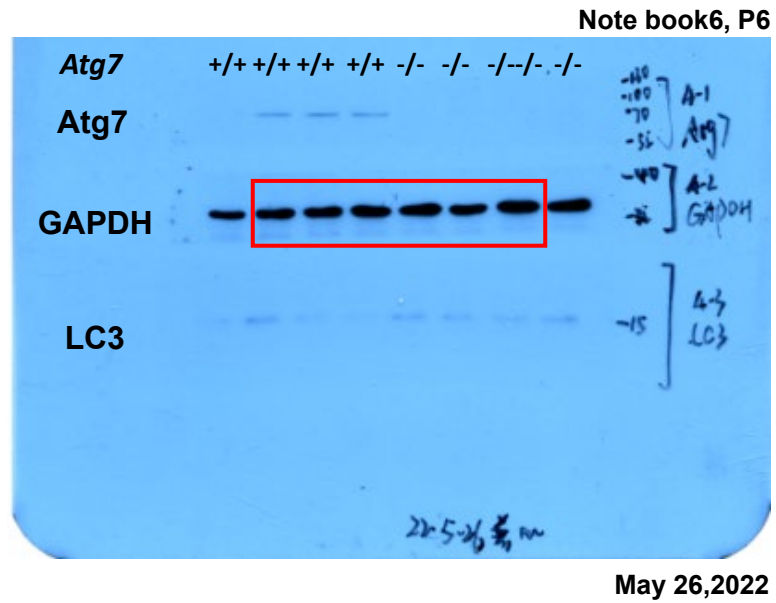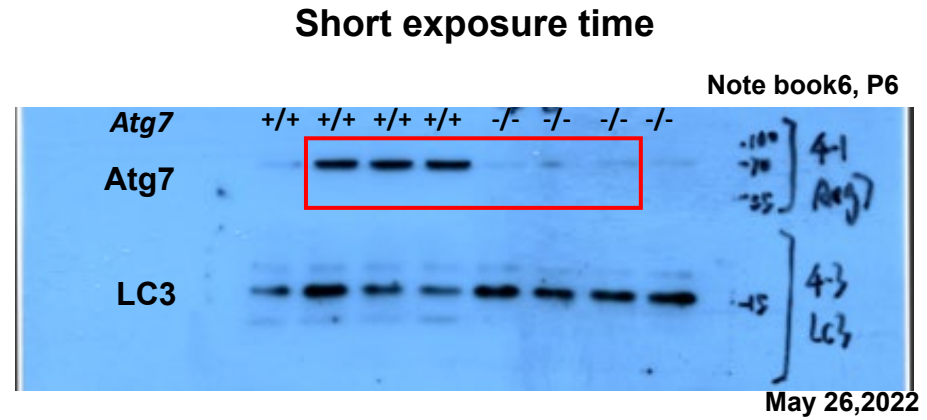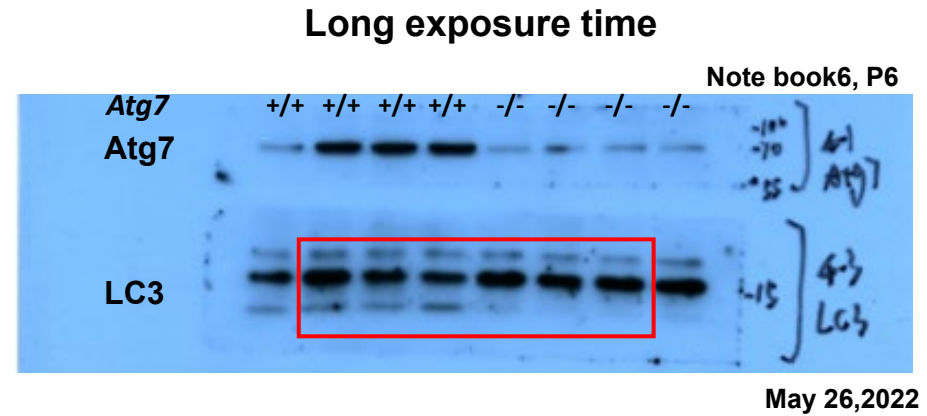

# Unedited blots for Figure 9I

Short exposure time

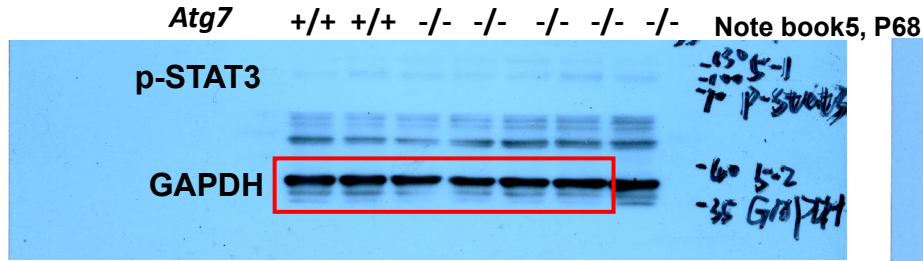

Jan 22, 2022

Long exposure time

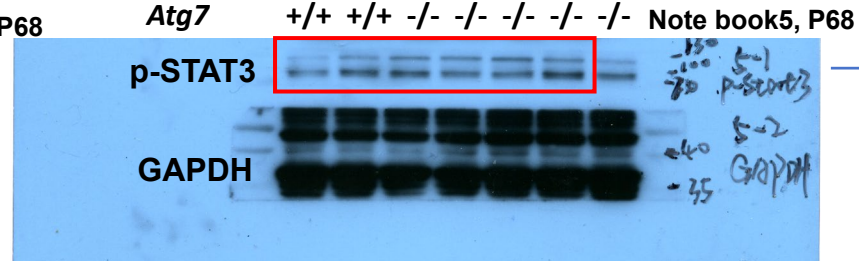

Jan 22, 2022

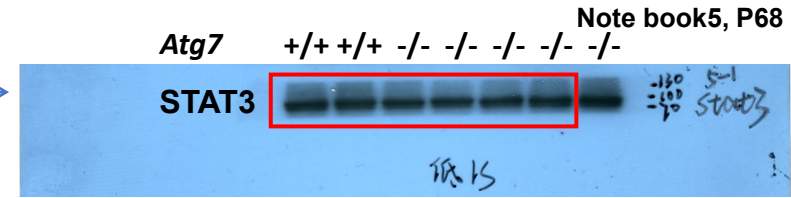

Jan 23, 2022

The blot of STAT3 was reprobbed from the blot of p-STAT3(Y705)

Short exposure time

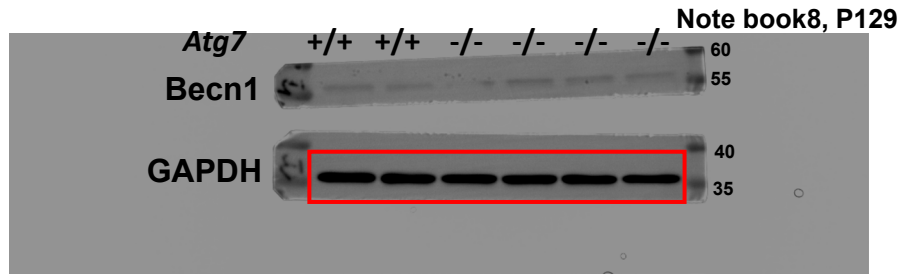

Sep 18, 2024

Long exposure time

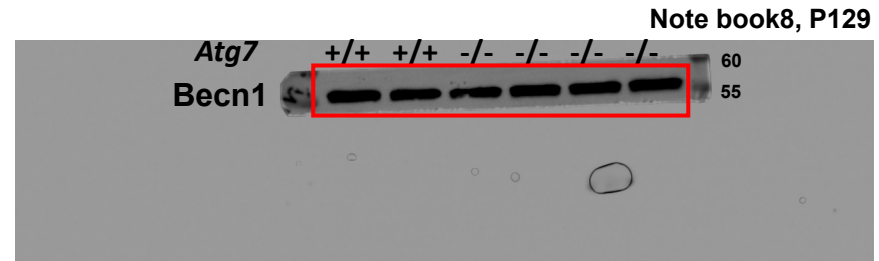

Sep 18, 2024

# Unedited blots for Figure 9K

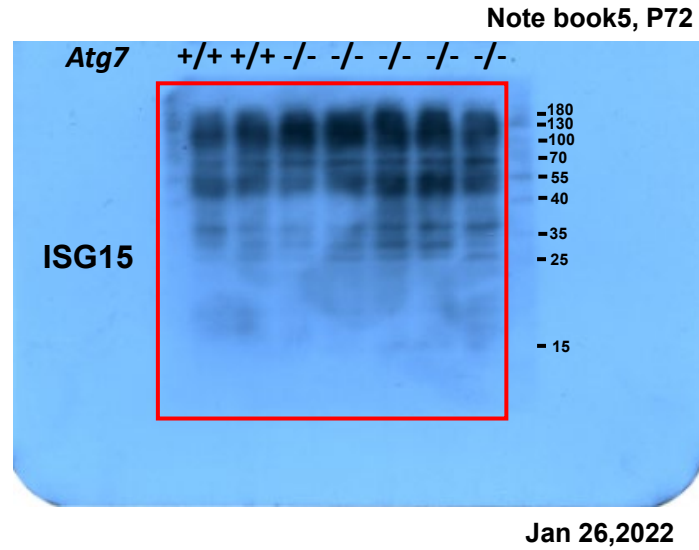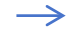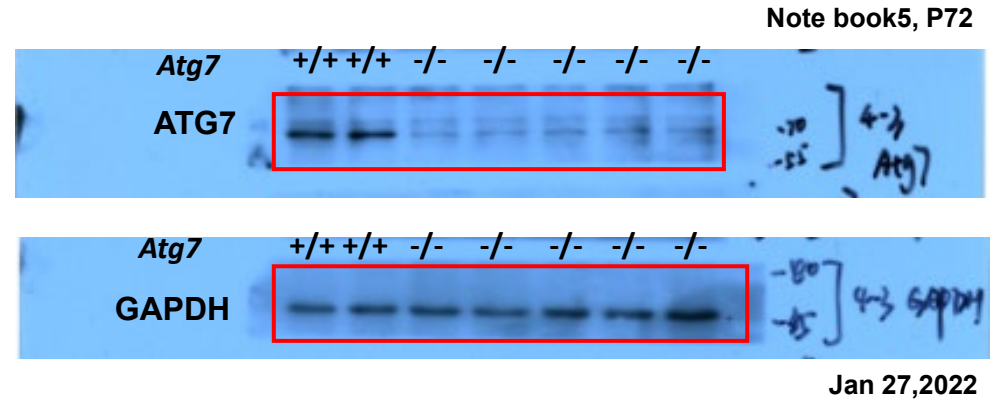

The right panel was reprobbed from the left panel



# Unedited blots for Figure S1B

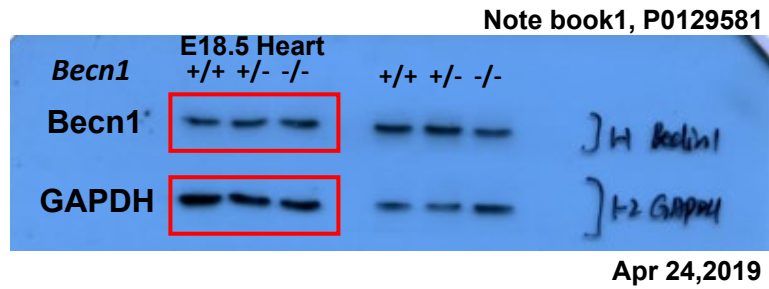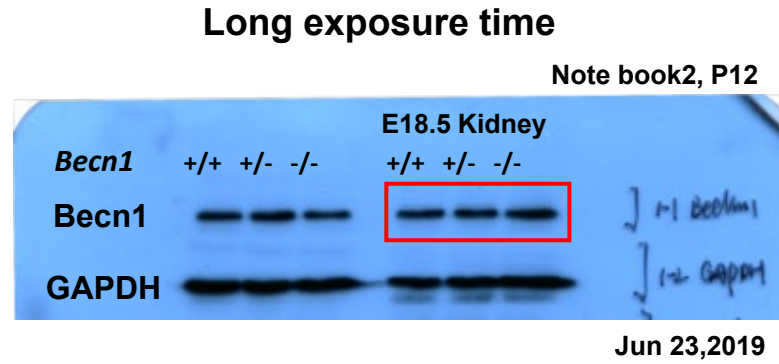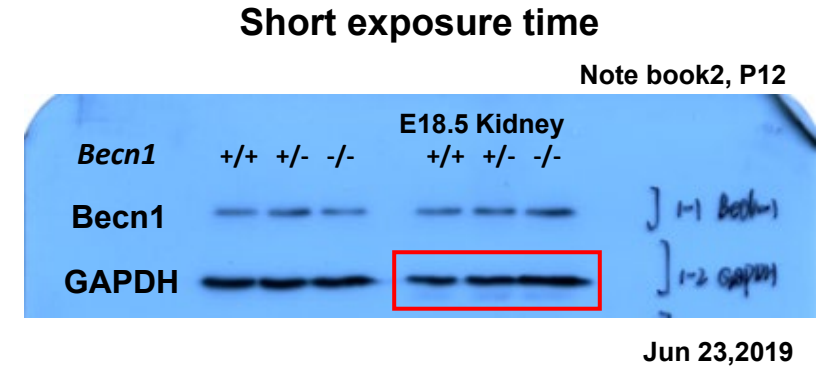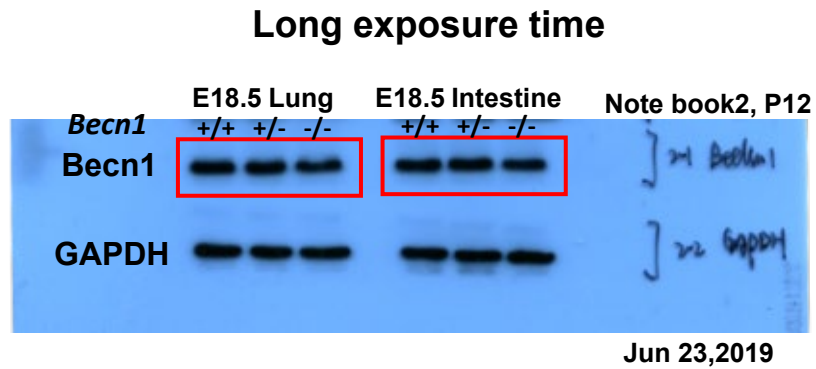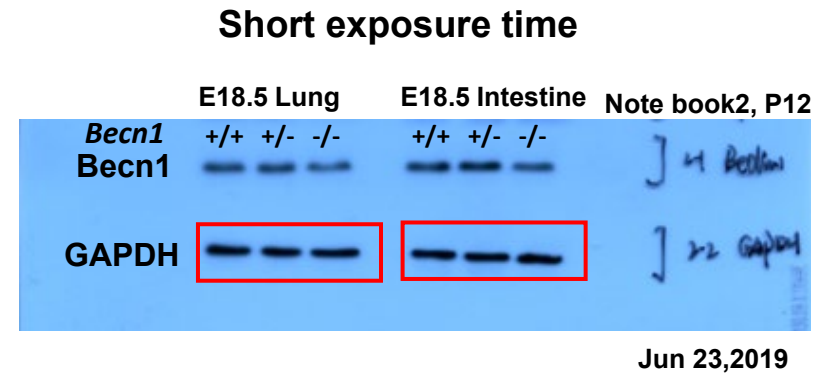

# Unedited blots for Figure S8A

Note book5, P35

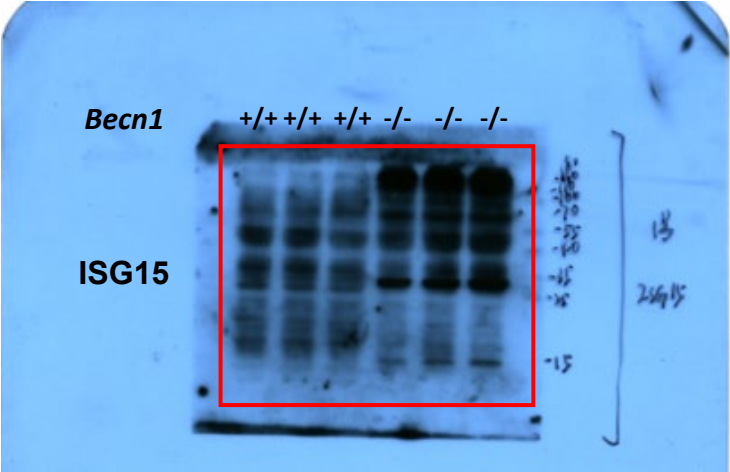

Dec 14,2021

Long exposure time

Note book5, P36

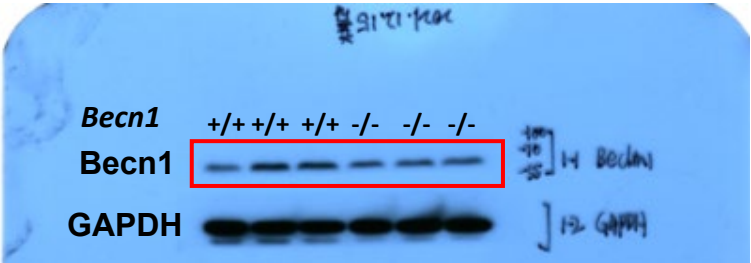

Dec 15,2021

Short exposure time

Note book5, P36

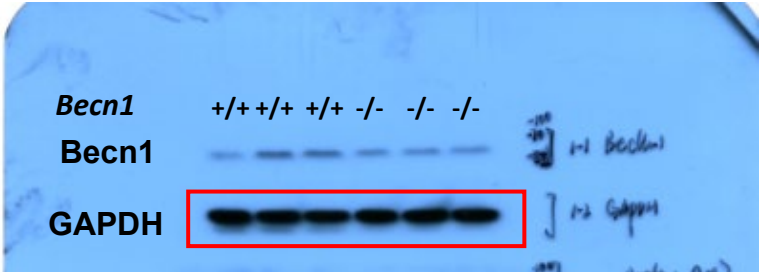

Dec 15,2021

The two right panels were reprobbed from the left panel

# Unedited blots for Figure S13C

### Long exposure time

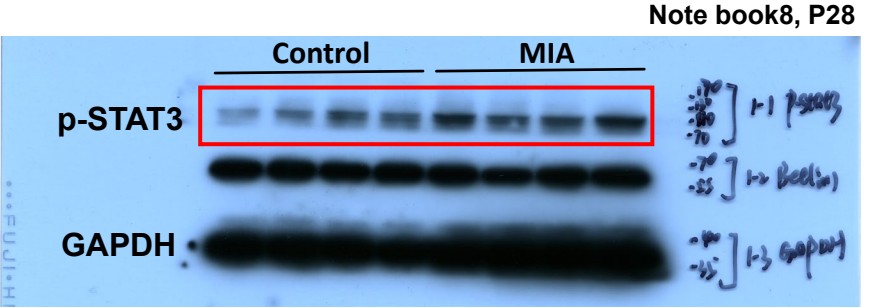

Apr 10,2024

### Short exposure time

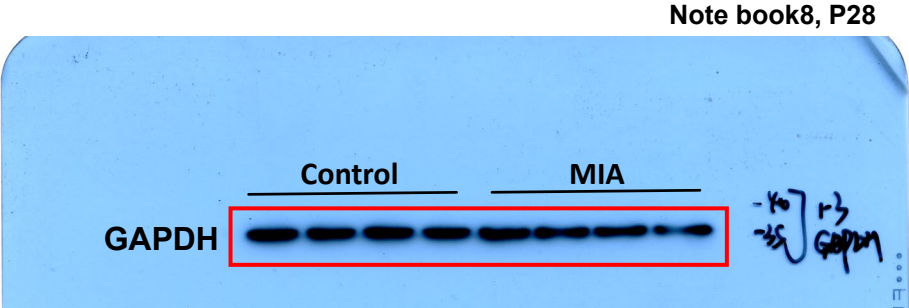

Apr 10,2024

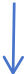

### Note book8, P31

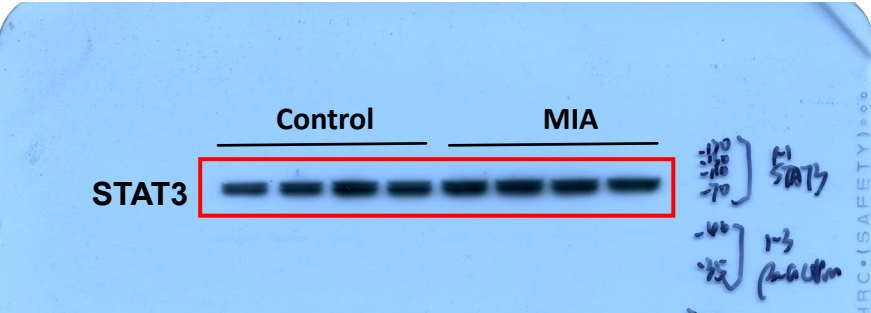

Apr 11,2024

The blot of STAT3 was re-probed from the blot of p-STAT3(Y705)
